# Supplementary material for: MicroRNA miR-146a and further oncogenesis-related cellular microRNAs are dysregulated in HTLV-1-transformed T lymphocytes
Source: Springer Nature journal article supplement (doi:10.1186/1742-4690-5-100), 2008-01-01
Supplement: 12977_2008_925_MOESM1_ESM.pdf [file 12977_2008_925_MOESM1_ESM.pdf]

SUPPLEMENTARY TABLE S1

| provirus copy number per cell (PL) |        |      |      |      |      |     |      |
|------------------------------------|--------|------|------|------|------|-----|------|
| cell line                          | C91-PL | MT-2 | JuaW | PaBe | StEd | Eva | Xpos |
| PL                                 | .96    | 1.99 | .33  | .28  | 1.57 | .44 | .40  |

  

| microRNA | Correlation PL – microRNA expression |          | <i>N</i> |
|----------|--------------------------------------|----------|----------|
|          | correlation coefficient              | <i>P</i> |          |
| miR-223  | –.643                                | .119     | 7        |
| miR-214  | .321                                 | .482     | 7        |
| miR-191  | –.214                                | .645     | 7        |
| miR-155  | –.071                                | .879     | 7        |
| miR-146a | –.107                                | .819     | 7        |
| miR-24   | –.429                                | .337     | 7        |
| miR-21   | –.179                                | .702     | 7        |
