# Supplementary material for: MicroRNA miR-146a and further oncogenesis-related cellular microRNAs are dysregulated in HTLV-1-transformed T lymphocytes
Source: Springer Nature journal article supplement (doi:10.1186/1742-4690-5-100), 2008-01-01
Supplement: 12977_2008_925_MOESM2_ESM.pdf [file 12977_2008_925_MOESM2_ESM.pdf]

SUPPLEMENTARY TABLE S2:

| PRIMERS AND PROBES           |                                    |
|------------------------------|------------------------------------|
| BIC transcript RT-PCR        |                                    |
| pri-miR-155 fwd              | TATAAAGCTTCTAATGGTGGCACAAACCAG     |
| pri-miR-155 rev              | TTAATCTAGAAAACCTGCAATTAAGAATGACATG |
| BIC transcript qPCR          |                                    |
| pri-miR-155 TaqMan fwd       | TCAAGAACAACCTACCAGAGACCTT          |
| pri-miR-155 TaqMan rev       | TCCTGGTTTGTGCCACCAT                |
| pri-miR-155 TaqMan probe     | ACCTTGGCTCTCCCACCCAATGGA           |
| ACTB qPCR                    |                                    |
| ACTB TaqMan fwd              | CCTCGCCTTTGCCGA                    |
| ACTB TaqMan rev              | TGGTGCCTGGGGCG                     |
| ACTB TaqMan probe            | CCGCCGCCGTCCACACCCGCC              |
| miR146a promoter cloning     |                                    |
| 146a_prom_fwd                | AATATAGCTAGCTTCTGCCTGATCTTCTCC     |
| 146a_prom_rev                | ATATACTCGAGAGAGGAAGGCAGCTAAGG      |
| 146a_promoter_delta_dist_fwd | CGATAAAGCTCTCCGCGGGGCTGCG          |
| 146a_promoter_delta_dist_rev | CGCAGCCCCGCGGAGAGCTTTATCG          |
| 146a_promoter_delta_prox_fwd | GAGGGATCTAGAAAGAGAGGGTTAGCG        |
| 146a_promoter_delta_prox_rev | CGCTAACCTCTCTTTCTAGATCCCTC         |
