# Supplementary material for: MicroRNA miR-146a and further oncogenesis-related cellular microRNAs are dysregulated in HTLV-1-transformed T lymphocytes
Source: Springer Nature journal article supplement (doi:10.1186/1742-4690-5-100), 2008-01-01

SUPPLEMENTARY FIGURE S3

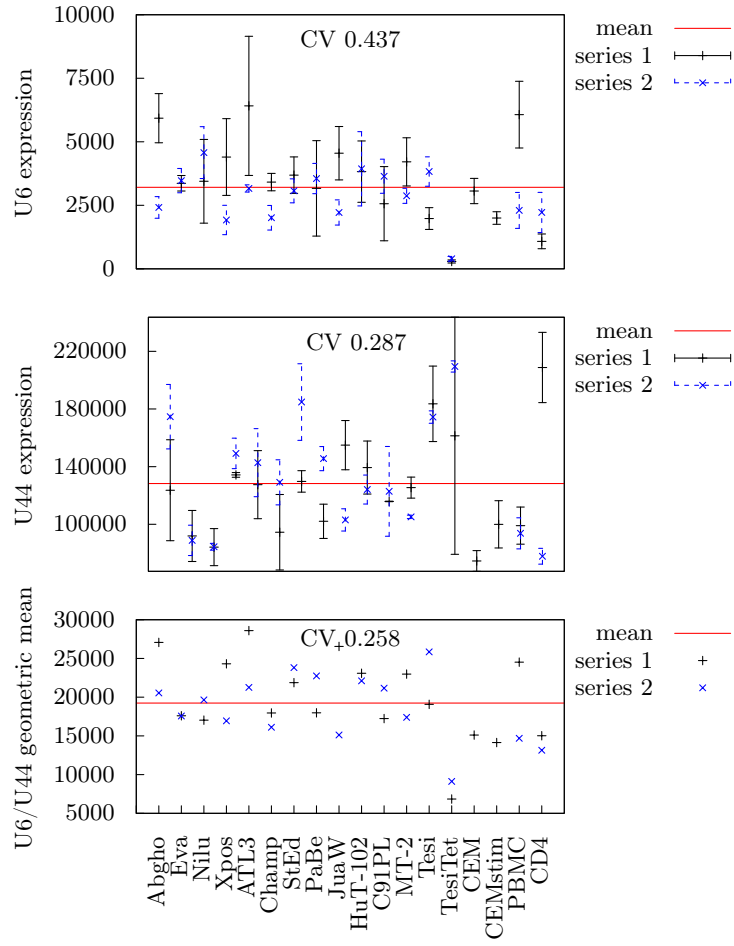

Supplement: 12977_2008_925_MOESM3_ESM.pdf [file 12977_2008_925_MOESM3_ESM.pdf]
