# Supplementary material for: MicroRNA miR-146a and further oncogenesis-related cellular microRNAs are dysregulated in HTLV-1-transformed T lymphocytes
Source: Springer Nature journal article supplement (doi:10.1186/1742-4690-5-100), 2008-01-01
Supplement: 12977_2008_925_MOESM4_ESM.pdf [file 12977_2008_925_MOESM4_ESM.pdf]

SUPPLEMENTARY TABLE S4

|                  | (normalizing transcript).(microRNA) |         |         |         |          |        |        |
|------------------|-------------------------------------|---------|---------|---------|----------|--------|--------|
|                  | u44.223                             | u44.214 | u44.191 | u44.155 | u44.146a | u44.24 | u44.21 |
| Mann-Whitney     | 54                                  | 74      | 91      | 8       | 25       | 54     | 28     |
| Z score          | -.1629                              | -.749   | 0.000   | -3.655  | -2.906   | -1.629 | -2.774 |
| <i>P</i> (asyp.) | .103                                | .454    | 1.000   | .000    | .004     | .103   | .006   |
| <i>P</i> (exact) | .109                                | .476    | 1.000   | .000    | .002     | .109   | .004   |
|                  | u6.223                              | u6.214  | u6.191  | u6.155  | u6.146a  | u6.24  | u6.21  |
| Mann-Whitney     | 44                                  | 62      | 79      | 3       | 16       | 45     | 17     |
| Z score          | -2.070                              | -1.277  | -.528   | -3.875  | -3.303   | -2.026 | -3.259 |
| <i>P</i> (asyp.) | .038                                | .202    | .597    | .000    | .001     | .043   | .001   |
| <i>P</i> (exact) | .039                                | .215    | .620    | .000    | .000     | .043   | .000   |
|                  | geo.223                             | geo.214 | geo.191 | geo.155 | geo.146a | geo.24 | geo.21 |
| Mann-Whitney     | 45                                  | 79      | 85      | 4       | 16       | 48     | 22     |
| Z score          | -2.026                              | -.528   | -.265   | -3.831  | -3.303   | -1.894 | -3.039 |
| <i>P</i> (asyp.) | .043                                | .597    | .792    | .000    | .001     | .058   | .002   |
| <i>P</i> (exact) | .043                                | .620    | .813    | .000    | .000     | .060   | .001   |
