# Supplementary figures and images for: MicroRNA miR-146a and further oncogenesis-related cellular microRNAs are dysregulated in HTLV-1-transformed T lymphocytes
Source: Springer Nature journal article supplement (doi:10.1186/1742-4690-5-100), 2008-01-01

**A**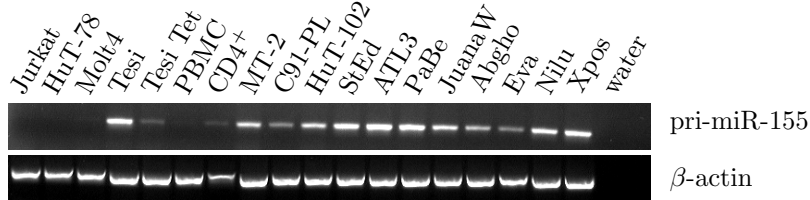**B**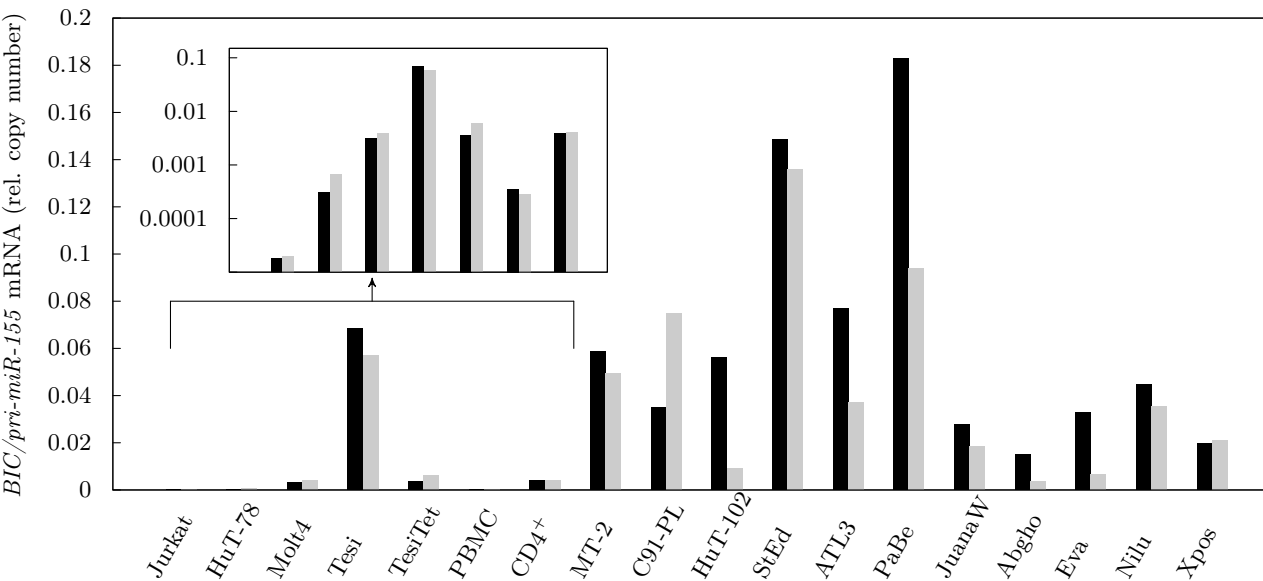

Supplement: 12977_2008_925_MOESM5_ESM.pdf [file 12977_2008_925_MOESM5_ESM.pdf]

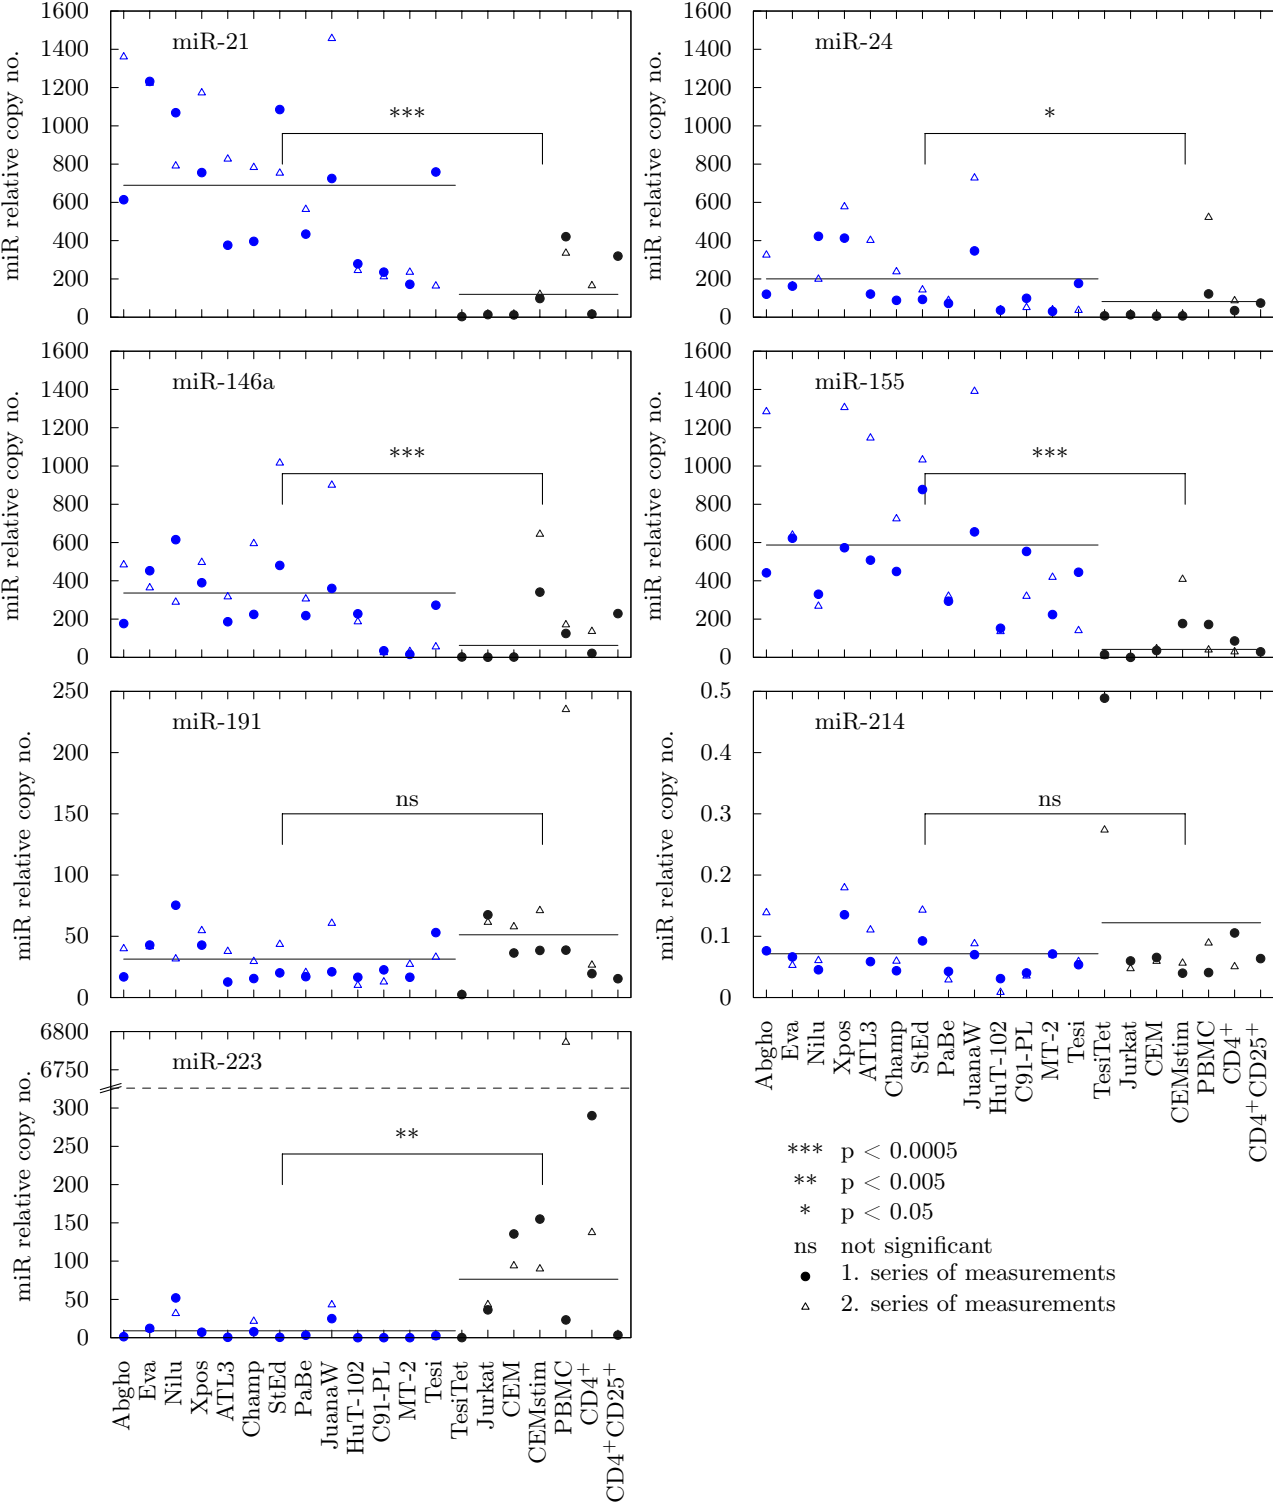

Supplement: 12977_2008_925_MOESM6_ESM.pdf [file 12977_2008_925_MOESM6_ESM.pdf]

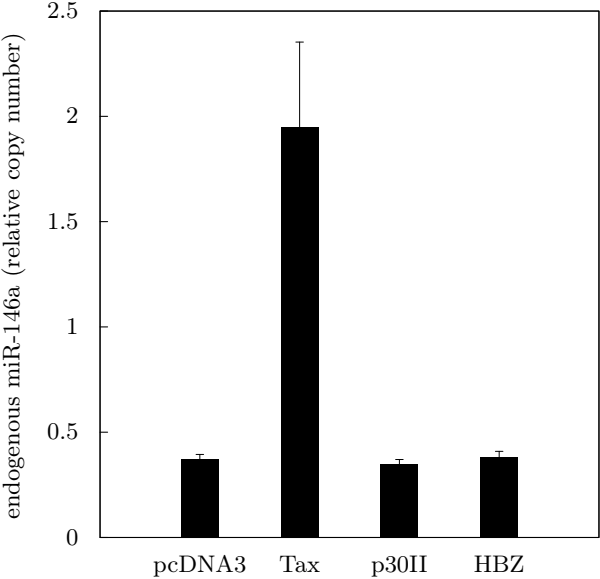

Supplement: 12977_2008_925_MOESM7_ESM.pdf [file 12977_2008_925_MOESM7_ESM.pdf]

**A**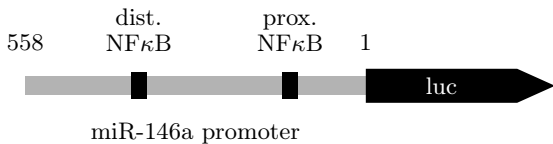**B**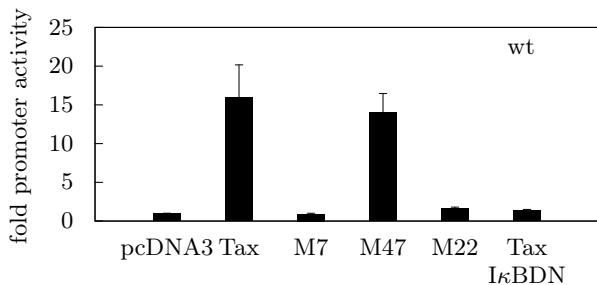**C**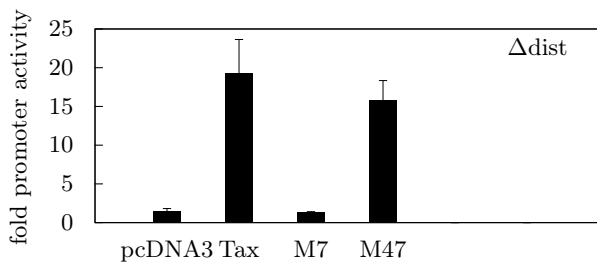**D**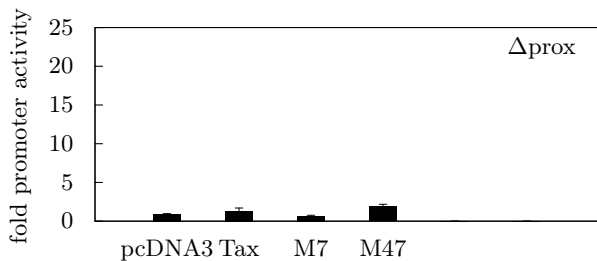

Supplement: 12977_2008_925_MOESM8_ESM.pdf [file 12977_2008_925_MOESM8_ESM.pdf]
